# Supplementary material
Source: Springer Nature journal article supplement (https://www.springermedizin.de/resource/supplementary/12889_2012_4118_MOESM3_ESM.pdf/9491696)
Supplement: MOESM3 [file 9491696]

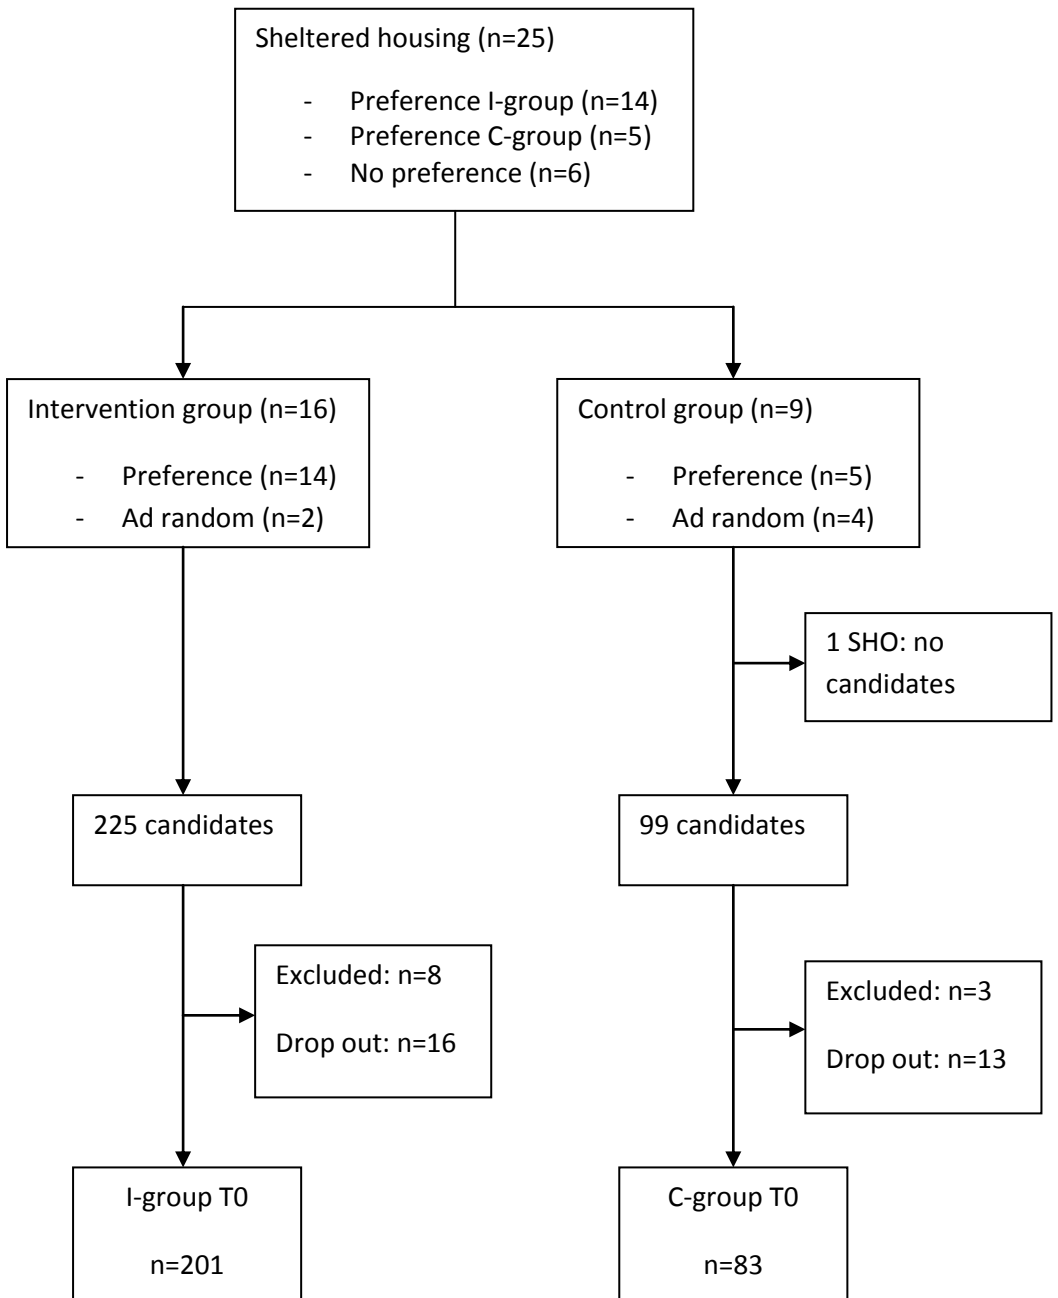

I-group, Intervention Group; C-group, Control Group; SHO, sheltered housing organization; T0, baseline measurement
